# Supplementary material for: Leaf wax n -alkanes in modern plants and topsoils from eastern Georgia (Caucasus) – implications for reconstructing regional paleovegetation
Source: Copernicus journal article supplement (doi:10.5194/bg-15-3927-2018), 2018-06-29
Supplement: Supplementary file 1 [file bg-15-3927-2018-supplement.zip]

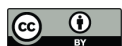

## *Supplement of*

# **Leaf wax *n*-alkanes in modern plants and topsoils from eastern Georgia (Caucasus) – implications for reconstructing regional paleovegetation**

**Marcel Bliedtner et al.**

*Correspondence to:* Marcel Bliedtner ([marcel.bliedtner@uni-jena.de](mailto:marcel.bliedtner@uni-jena.de))

- [bg-15-3927-2018-supplement-title-page.pdf](#)
- Supplement
  - [SOM-1\\_sample location.xlsx](#)
  - [SOM-2\\_site description.xlsx](#)
  - [SOM-3\\_n-alkane results.xlsx](#)

The copyright of individual parts of the supplement might differ from the CC BY 4.0 License.
