# Supplementary material for: Leaf wax n -alkanes in modern plants and topsoils from eastern Georgia (Caucasus) – implications for reconstructing regional paleovegetation
Source: Copernicus journal article supplement (doi:10.5194/bg-15-3927-2018), 2018-06-29
Supplement: Supplementary file 2 [file bg-15-3927-2018-supplement.zip]

Archive with 5 entries (4 files):
- Supplement/
- Supplement/SOM-1_sample location.xlsx
- Supplement/SOM-2_site description.xlsx
- Supplement/SOM-3_n-alkane results.xlsx
- bg-15-3927-2018-supplement-title-page.pdf
