# Supplementary material for: Leaf wax n -alkanes in modern plants and topsoils from eastern Georgia (Caucasus) – implications for reconstructing regional paleovegetation
Source: Copernicus journal article supplement (doi:10.5194/bg-15-3927-2018), 2018-06-29
Supplement: Supplementary file 2 [file bg-15-3927-2018-supplement.zip › Supplement/SOM-3_n-alkane results.xlsx]

## Sheet: data
SOM-3: n-Alkane results from plants and topsoils
Sample	C23	C25	C26	C27	C28	C29	C30	C31	C32	C33	C34	C35	weight [g]	conc. [µg/g]	OEP	ACL	n-alkane ratio
Grass sites:
1p	1.42266	3.69424	1.56535	6.45264	1.83633	7.30635	2.07794	21.8153	1.89269	25.4382	1.04796	6.7506	1.668	79.8777	8.27592	31.1713	0.774489
1s	0.0937779	0.131396	0.0826351	0.233197	0.0936887	0.488679	0.0573186	0.822428	0.0570512	0.329738	0.021929	0.0793368	11.218	2.3974	6.4468	30.3326	0.614803
2p	1.3555	2.78901	1.10816	5.96365	1.96986	31.6605	2.11436	36.0807	1.36879	14.125	0.844858	2.20922	1.128	100.234	13.3863	30.3291	0.571625
2s	0.149988	0.205636	0.113128	0.326328	0.112809	0.774063	0.0756309	1.0117	0.0661572	0.383011	0.0242019	0.0715707	12.561	3.16424	6.78523	30.1634	0.55898
4p	2.34592	5.11668	1.52093	6.72135	1.80439	6.56005	1.82361	20.3075	1.69938	20.7962	0.829787	4.46259	1.457	71.6424	7.94137	31.0292	0.755789
4s	0.277036	0.382095	0.253137	0.395638	0.214001	0.617805	0.116411	0.913663	0.108245	0.501195	0.0593507	0.155746	10.042	3.71729	3.51015	30.2522	0.582653
6p	1.30229	1.68546	0.981209	3.26471	1.45752	24.3374	2.19118	67.3766	1.81699	25.6168	0.691993	2.51634	1.224	131.936	18.706	30.9129	0.771118
6s	0.310096	0.262837	0.17537	0.258138	0.133681	0.520191	0.0789382	1.22359	0.0807659	0.448303	0.0280244	0.0718886	11.49	3.28172	5.22707	30.5199	0.682343
7p	0.655008	1.72496	0.618442	2.70111	0.881558	8.34738	0.86248	13.9873	0.747218	6.39269	0.613672	1.58744	1.258	38.4642	10.1066	30.5318	0.648456
7s	0.134037	0.212868	0.0874592	0.620508	0.240094	1.89419	0.14786	2.3929	0.113261	0.721789	0.0371115	0.16696	11.937	6.635	9.56283	30.1426	0.55329
9p	1.83704	3.71687	1.78765	14.8979	3.52181	93.2181	3.19918	22.5416	1.34733	7.76955	0.573663	1.16461	1.215	155.575	14.045	29.3349	0.218968
9s	0.217836	0.259319	0.147104	0.543873	0.209711	1.47582	0.14395	1.81342	0.11709	1.58029	0.0354617	0.106194	10.462	6.43223	8.7616	30.6367	0.626909
10p	2.3165	3.98249	1.86061	7.3165	1.95825	9.02896	1.80673	24.7044	1.59259	20.3677	0.815488	4.7037	1.485	78.1374	8.50872	30.8927	0.733863
10s	0.0937471	0.100851	0.0701	0.162352	0.0577624	0.19385	0.0272923	0.222077	0.0276661	0.129171	0.0188803	0.0439293	10.699	1.05393	3.86963	29.8992	0.496499
21p	2.1806	3.35652	1.06488	6.699	2.06288	25.0535	3.23545	49.6415	2.81806	25.8	1.04415	4.72709	1.495	125.503	11.6753	30.764	0.703785
21s	0.229754	0.274145	0.19836	0.239152	0.125775	0.333033	0.0826835	0.535093	0.0858828	0.393921	0.0418916	0.192761	10.002	2.5027	3.04688	30.4439	0.618848
22p	2.33236	5.11662	1.42128	9.11443	1.68149	8.6035	1.79883	21.6465	1.75	20.6224	1.07216	6.36006	1.372	79.1873	9.01841	30.793	0.704637
22s	0.0853381	0.0973171	0.0693001	0.184536	0.0962281	0.421542	0.0616771	0.952084	0.0680131	0.381348	0.028512	0.128898	10.101	2.48946	6.56975	30.578	0.68751
24p	2.46676	2.81479	0.947761	7.39891	1.87924	19.3643	2.22999	20.6133	1.36703	8.5692	0.455902	1.62144	1.474	67.2619	8.70884	30.0851	0.521622
24s	0.068549	0.0908275	0.0417007	0.136527	0.0410478	0.265138	0.027338	0.312388	0.0299494	0.133834	0.0137098	0.0337033	12.254	1.12616	6.05478	30.0462	0.526275
25p	1.61912	5.5286	1.94207	35.7495	5.87328	118.94	8.6908	114.72	2.35771	2.9218	0.325851	0.477915	1.381	299.147	14.4367	29.6229	0.431982
25s	0.112529	0.111673	0.0667123	0.215809	0.0833262	0.577374	0.0429905	0.610431	0.0325426	0.163741	0.0247495	0.0280894	11.677	1.95744	6.94837	29.9214	0.493935
31p	1.95316	2.71966	0.747339	3.41022	0.860185	3.58055	0.859475	7.43648	0.781405	6.90348	0.499645	2.55075	1.409	30.3492	6.56653	30.6721	0.672268
31s	0.155021	0.168197	0.095528	0.223997	0.110102	0.482332	0.0578958	0.665702	0.0439209	0.285187	0.0214614	0.105909	10.018	2.26023	5.39026	30.2214	0.573786
32p	0.362963	0.537037	0.448148	2.80463	1.64398	27.8444	2.82963	50.5014	1.56481	11.8204	0.2875	0.802778	2.16	101.085	14.3328	30.5346	0.670337
32s	0.105415	0.21959	0.0867012	0.430221	0.138861	1.07724	0.0978499	1.06799	0.0877961	0.460283	0.0250846	0.101035	10.046	3.79265	7.38247	30.0267	0.503427
34p	1.15062	1.65605	0.727734	2.9008	1.32875	11.2896	0.803765	4.29616	0.280956	0.611151	0	0.364953	1.381	25.4106	6.07976	29.2741	0.256958
34s	0.151374	0.195417	0.153791	0.284397	0.132396	0.759556	0.110644	0.967147	0.0992749	0.320831	0.0315997	0.0674962	11.171	3.12255	4.70047	30.1359	0.552322
Deciduous sites:
3p	1.63148	3.25741	0.834259	5.01204	1.59722	41.138	2.16204	37.9194	1.35	1.90463	0	0	1.08	96.8065	14.4652	29.8541	0.46321
3s	0.191835	0.339105	0.164584	0.979046	0.23089	2.12691	0.145106	1.19105	0.0708313	0.361338	0.0236104	0.061092	10.165	5.69356	7.61899	29.4013	0.333249
5p	1.52168	2.01445	0.729769	2.58671	1.25	38.3829	1.76156	26.4682	1.28035	1.72688	0	0	0.692	77.7225	13.7732	29.7904	0.407651
5s	0.255943	0.508438	0.211486	1.52631	0.315551	3.8288	0.226819	1.78171	0.0765741	0.136182	0.0215024	0.0290328	11.022	8.6624	8.75811	29.1451	0.2637
16p	1.95157	3.94777	0.738841	4.36467	1.11681	15.1415	0.77208	3.84236	0.590693	0.647673	0	0	1.053	31.1624	7.45589	29.0644	0.187114
16s	0.329005	0.378945	0.180184	0.910408	0.29145	3.77707	0.179984	1.27147	0.05833	0.142928	0.0202757	0.048342	10.012	7.25939	8.59482	29.212	0.231798
20p	1.02638	1.62934	0.88417	2.57851	1.19241	12.1345	1.37066	5.36873	0.480051	0.43758	0	0	1.554	26.0759	5.22481	29.3573	0.282968
20s	0.3052	0.3648	0.176	0.8455	0.146	1.2746	0.0533	0.3725	0.0297	0.0536	0.0196	0.0313	10	3.3669	6.28691	28.7127	0.167347
23p	0.951484	1.26937	0.480811	2.83635	0.739319	7.26213	0.627806	2.79797	0.280956	0.349022	0	0.291818	1.381	16.9356	6.22177	29.0996	0.23759
23s	0.0756549	0.0516578	0.0271112	0.0796849	0.0315076	0.216706	0.0170361	0.412163	0.0211577	0.132808	0.0132808	0.0401172	10.918	1.11889	8.69063	30.4217	0.647725
29p	1.78634	6.07307	1.45036	11.6052	2.6807	58.5099	5.2224	87.4043	3.03495	13.2264	0.477363	1.66878	1.259	193.14	13.7827	30.1977	0.589359
29s	0.244261	0.30352	0.126169	0.573882	0.208468	2.80871	0.201071	1.86524	0.0879102	0.394746	0.0144533	0.0720116	11.762	6.90044	9.04813	29.7376	0.400524
30p	1.71468	2.74495	1.41376	12.7321	1.27339	21.3422	0.453211	7.27431	0.308257	0.406422	0.26789	0.380734	1.09	48.5972	12.1077	28.7775	0.183947
30s	0.250465	0.294313	0.18616	0.92258	0.25115	2.12205	0.135265	0.803954	0.0321034	0.0649897	0.0162474	0.0287756	10.217	4.85759	6.47216	29.0058	0.222033
35p	1.29614	1.91588	0.67382	2.68927	1.02318	6.58112	0.803433	2.82318	0.403433	0.430901	0.338197	0.375966	1.165	18.0584	4.31304	29.159	0.259818
35s	0.422166	0.901018	0.399158	2.21402	0.453887	2.73791	0.233014	0.846877	0.0767574	0.1215	0.0318191	0.0598199	10.214	8.07578	5.09135	28.6202	0.163569
Xp = vegetation sample
Xs = soil surface sample

## Sheet: environmental parameters
SOM-3: environmental parameters
Sites	Vegetation	Altitude (m a.s.l.)	Mean annual temperature (°C)	Annual precipitation (mm)		Reference climate station: Tbilisi, 490 m a.s.l. (Average monthly temperatures for 1962-1990)
1	grass	742	11.362	600-800		https://www.yr.no/place/Georgia/Tbilisi/Tbilisi/statistics.html
2	grass	809	10.9265	600-800
3	dec	924	10.179	600-800		Month	Temperature
4	grass	871	10.5235	600-800		Jan	1.7
5	dec	830	10.79	600-800		Feb	2.9
6	grass	887	10.4195	600-800		Mar	6.9
7	grass	1199	8.3915	800-1000		Apr	12.8
9	grass	1659	5.4015	1000-1200		May	17.4
10	grass	485	13.0325	800-1000		Jun	21.2
16	dec	990	9.75	1600-2000		Jul	24.4
20	dec	790	11.05	1200-1600		Aug	23.7
21	grass	645	11.9925	1200-1600		Sept	19.6
22	grass	622	12.142	1000-1200		Oct	13.5
23	dec	759	11.2515	1200-1600		Nov	8.1
24	grass	748	11.323	1200-1600		Dec	3.8
25	grass	570	12.48	800-1000		mean	13
29	dec	774	11.154	800-1000
30	dec	728	11.453	800-1000
31	grass	705	11.6025	800-1000
32	grass	685	11.7325	800-1000
34	grass	445	13.2925	800-1000
35	dec	1174	8.554	800-1000

## Sheet: comparison endmember-model
SOM-3: Comparison endmember model with different ratios
